# Supplementary material
Source: PubMed Central journal article supplement (PMC9380564)
Supplement: jb.00197-22-s0001.pdf [file jb.00197-22-s0001.pdf]

**Supplemental Material:**

**Highlighting the unique roles of radical SAM enzymes in methanogenic archaea**

Kaleb Boswinkle\*, Justin McKinney\*, and Kylie D. Allen<sup>#</sup>

Department of Biochemistry, Virginia Polytechnic Institute and State University, Blacksburg,  
VA, USA 24061

\*These authors contributed equally

<sup>#</sup>Address correspondence to: Kylie D. Allen, E-mail: [kdallen@vt.edu](mailto:kdallen@vt.edu), Phone: 540-231-5040

| <b>Table S1. Proteins with CX<sub>3</sub>CX<sub>2</sub>C domain in <i>M. maripaludis</i> S2 genome (tax ID 267377)</b> |                  |                                                                                                   |                   |                                               |
|------------------------------------------------------------------------------------------------------------------------|------------------|---------------------------------------------------------------------------------------------------|-------------------|-----------------------------------------------|
| <b>UniProtKB Accession number</b>                                                                                      | <b>Locus tag</b> | <b>Annotation</b>                                                                                 | <b>Comments</b>   | <b>Selected references</b>                    |
| Q6M170                                                                                                                 | MMP0047          | Hypothetical protein; TIGR04013 family B12-binding domain/radical SAM domain-containing protein   |                   |                                               |
| Q6M161                                                                                                                 | MMP0056          | CofH1, F <sub>0</sub> synthase subunit 2                                                          |                   | Philmus et al., 2015 (1)                      |
| Q6M160                                                                                                                 | MMP0057          | CofH2; F <sub>0</sub> synthase subunit 2                                                          |                   | Philmus et al., 2015 (1)                      |
| Q6M141                                                                                                                 | MMP0077          | QueE, 7-carboxy-7-deazaguanine synthase                                                           |                   | McCarty et al., 2013 (2)                      |
| Q6M124                                                                                                                 | MMP0094          | tRNA pseudouridine (54/55) synthase, Pus10                                                        | Not a radical SAM |                                               |
| Q6M0T1                                                                                                                 | MMP0188          | Dph2, dipthamide biosynthesis enzyme                                                              |                   | Su et al., 2013 (3)                           |
| Q6M096                                                                                                                 | MMP0375          | Conserved hypothetical protein                                                                    |                   |                                               |
| Q6M059                                                                                                                 | MMP0412          | MtaB, tRNA-t(6)A37 methylthiotransferase                                                          |                   | Arragain et al., 2010 (4)                     |
| Q6LZX9                                                                                                                 | MMP0494          | helicase family member with a unique C-terminal domain including a metal-binding cysteine cluster |                   |                                               |
| Q6LZS9                                                                                                                 | MMP0544          | MoaA/nifB/pqqE family, AmmeMemoRadiSam system radical SAM enzyme                                  |                   |                                               |
| Q6LZQ3                                                                                                                 | MMP0571          | GTP 3',8-cyclase MoaA                                                                             |                   |                                               |
| Q6LZP4                                                                                                                 | MMP0580          | Radical activating enzyme                                                                         |                   |                                               |
| Q6LZH0                                                                                                                 | MMP0658          | NifB, nitrogen fixation protein                                                                   |                   | Hu and Ribbe, 2016 (5); Kang et al., 2021 (6) |

|        |         |                                                                           |                                                         |                               |
|--------|---------|---------------------------------------------------------------------------|---------------------------------------------------------|-------------------------------|
| Q6LZC5 | MMP0704 | Iron-sulfur cluster carrier protein, Mrp/NBP35 family ATP-binding protein | Likely not radical SAM                                  |                               |
| Q6LYX4 | MMP0861 | KAM, lysine 2,3-aminomutase                                               |                                                         | Pflüger et al., 2003 (7)      |
| Q6LYV9 | MMP0876 | CofG, F <sub>0</sub> synthase subunit 1                                   |                                                         | Philmus et al., 2015 (1)      |
| Q6LYA5 | MMP1086 | Radical SAM domain containing protein                                     |                                                         |                               |
| Q6LYA4 | MMP1087 | Uncharacterized protein                                                   |                                                         |                               |
| Q6LY68 | MMP1123 | B12-binding domain-containing radical SAM protein                         |                                                         |                               |
| Q6LY47 | MMP1146 | PurF, Amidophosphoribosyltransferase                                      | Likely not radical SAM                                  |                               |
| Q6LY40 | MMP1153 | nickel-dependent hydrogenase large subunit                                | Likely not radical SAM                                  |                               |
| Q6LY13 | MMP1180 | Radical SAM domain containing protein                                     |                                                         |                               |
| Q6LY01 | MMP1192 | Radical SAM domain containing protein                                     |                                                         |                               |
| Q6LY00 | MMP1193 | Hypothetical protein                                                      |                                                         |                               |
| Q6LXV8 | MMP1238 | Biotin synthase                                                           |                                                         |                               |
| Q6LXV1 | MMP1245 | FwdF, Tungsten containing formylmethanofuran dehydrogenase, subunit F     | Not a radical SAM                                       |                               |
| Q6LXQ2 | MMP1297 | FdhB, Formate dehydrogenase beta subunit                                  | Not a radical SAM                                       |                               |
| Q6LXK0 | MMP1350 | Radical SAM core domain-containing protein                                | This is likely QCMT, MCR glutamine C-methyl-transferase | Gagsteiger et al., 2022 (8)   |
| Q6LXB2 | MMP1440 | Taw1, 4-demethylwyosine synthase                                          |                                                         | Young and Bandarian, 2015 (9) |
| Q6LX72 | MMP1480 | 3-isopropylmalate dehydratase large subunit                               | Not a radical SAM                                       |                               |

|                                                                                             |         |                                                                                        |                                                                                                                   |                                                     |
|---------------------------------------------------------------------------------------------|---------|----------------------------------------------------------------------------------------|-------------------------------------------------------------------------------------------------------------------|-----------------------------------------------------|
| Q6LX00                                                                                      | MMP1554 | Conserved hypothetical archaeal protein                                                | This is Mmp10, MCR arginine methylase                                                                             | Radle et al., 2019 (10)                             |
| Q6LWR8                                                                                      | MMP1638 | MoaA/nifB/pqqE family, unknown function                                                |                                                                                                                   |                                                     |
| <b>Known radical SAM enzymes in <i>M. maripaludis</i> with non-canonical cysteine motif</b> |         |                                                                                        |                                                                                                                   |                                                     |
| Q6LWX7                                                                                      | MMP1577 | Elp3, tRNA uridine(34) 5-carboxymethylaminomethyl modification radical SAM/GNAT enzyme | CX <sub>4</sub> CX <sub>2</sub> C motif                                                                           | Selvadurai et al., 2014 (11)                        |
| Q6LYH7                                                                                      | MMP1014 | RaSEA, archaeosine biosynthesis protein                                                | CX <sub>7</sub> CX <sub>2</sub> C motif                                                                           | Yokogawa et al, 2019 (12)                           |
| P61428                                                                                      | MMP0187 | ThiC, Phosphomethylpyrimidine synthase                                                 | CX <sub>2</sub> CX <sub>3</sub> C motif                                                                           |                                                     |
| Q6M0Z2                                                                                      | MMP0126 | 5,10-methenyltetrahydromethanopterin hydrogenase cofactor biosynthesis protein HmdB    | This is now called HcgA, mis-annotated in some places as biotin synthase, CX <sub>5</sub> CX <sub>2</sub> C motif | McGlynn et al., 2010 (13); Schick et al., 2012 (14) |

| <b>Table S2. Proteins with CX<sub>3</sub>CX<sub>2</sub>C domain in <i>M. acetivorans</i> C2A genome (tax ID 188937)</b> |                  |                                                                                                               |                             |                                                       |
|-------------------------------------------------------------------------------------------------------------------------|------------------|---------------------------------------------------------------------------------------------------------------|-----------------------------|-------------------------------------------------------|
| <b>UniProtKB Accession number</b>                                                                                       | <b>Locus tag</b> | <b>Annotation</b>                                                                                             | <b>Comments</b>             | <b>Selected references</b>                            |
| Q8TUM6                                                                                                                  | MA_0040          | Tyw1/Taw1, 4-demethylwyosine synthase                                                                         |                             | Young and Bandarian, 2015 (9)                         |
| Q8TUV6                                                                                                                  | MA_0071          | Radical activating enzyme                                                                                     |                             |                                                       |
| Q8TUG2                                                                                                                  | MA_0105          | MoaA, GTP 3',8-cyclase                                                                                        |                             |                                                       |
| Q8TUB9                                                                                                                  | MA_0154          | PylB, (3R)-3-methyl-D-ornithine synthase                                                                      |                             | Krzycki, 2013 (15)                                    |
| Q8TUB3                                                                                                                  | MA_0160          | Hypothetical protein                                                                                          |                             |                                                       |
| Q8TU32                                                                                                                  | MA_0242          | Hypothetical protein                                                                                          |                             |                                                       |
| Q8TTX0                                                                                                                  | MA_0305          | FmdF, formylmethaofuran dehydrogenase, subunit F                                                              | Ferredoxin, not radical SAM |                                                       |
| Q8TTT9                                                                                                                  | MA_0336          | cell-surface protein                                                                                          |                             |                                                       |
| Q8TTJ5                                                                                                                  | MA_0436          | Hypothetical protein                                                                                          |                             |                                                       |
| Q8TT64                                                                                                                  | MA_0573          | NirJ/AhbD, Heme d1 biosynthesis protein                                                                       |                             | Kuhner et al., 2014 (16);<br>Kuhner et al., 2016 (17) |
| Q8TT18                                                                                                                  | MA_0622          | Hypothetical protein                                                                                          |                             |                                                       |
| Q8TSX9                                                                                                                  | MA_0664          | Rnf electron transport complex subunit B                                                                      | Not radical SAM             |                                                       |
| Q8TSK2                                                                                                                  | MA_0794          | Tungsten-containing aldehyde ferredoxin oxidoreductase cofactor modifying protein                             |                             |                                                       |
| Q8TSK1                                                                                                                  | MA_0795          | Hypothetical protein                                                                                          |                             |                                                       |
| Q8TRQ9                                                                                                                  | MA_1114          | MoaA/nifB/pqqE family protein, lipid biosynthesis(?)                                                          |                             | Zeng et al., 2022 (18)                                |
| Q8TRM2                                                                                                                  | MA_1153          | MtaB, 2-methylthioadenine synthase                                                                            |                             | Arragain et al., 2010 (4)                             |
| Q8TRH4                                                                                                                  | MA_1204          | Hypothetical protein                                                                                          |                             |                                                       |
| Q8TR79                                                                                                                  | MA_1302          | Tungsten-containing aldehyde ferredoxin oxidoreductase cofactor modifying protein, MoaA/NifB/PqqE/SkfB family |                             |                                                       |

|        |         |                                                                       |                                                                      |                                                       |
|--------|---------|-----------------------------------------------------------------------|----------------------------------------------------------------------|-------------------------------------------------------|
| Q8TQW6 | MA_1421 | Predicted protein                                                     |                                                                      |                                                       |
| Q8TQQ4 | MA_1486 | MoaA/nifB/pqqE family protein, Tetraether synthase (Tes)              |                                                                      | Zeng et al., 2022 (18)                                |
| Q8TQQ1 | MA_1489 | cofH2, F <sub>0</sub> synthase subunit 2                              |                                                                      | Philmus et al., 2015 (1)                              |
| Q8TQQ0 | MA_1490 | cofH1, F <sub>0</sub> synthase subunit 2                              |                                                                      | Philmus et al., 2015 (1)                              |
| Q8TQP9 | MA_1491 | cofG, F <sub>0</sub> synthase subunit 1                               |                                                                      | Philmus et al., 2015 (1)                              |
| Q8TQM0 | MA_1520 | Hypothetical protein                                                  |                                                                      |                                                       |
| Q8TPT1 | MA_1824 | thymidylate synthase, DUF166 superfamily (functions unknown)          | Thymidylate synthase annotation likely incorrect                     |                                                       |
| Q8TNN8 | MA_2245 | ferredoxin                                                            | Likely not radical SAM                                               |                                                       |
| Q8TNN6 | MA_2248 | Predicted protein                                                     |                                                                      |                                                       |
| Q8TNM4 | MA_2260 | Predicted protein                                                     |                                                                      |                                                       |
| Q8TN83 | MA_2410 | Formate acetyltransferase activating enzyme, pfl                      |                                                                      |                                                       |
| Q8TMU4 | MA_2557 | Predicted protein                                                     |                                                                      |                                                       |
| Q8TML0 | MA_2647 | AtsB, Arylsulfatase regulator                                         | Two genes annotated as AtsB in MA genome                             |                                                       |
| Q8TMI5 | MA_2672 | ATP-dependent helicase, YprA superfamily, C-term metal binding domain |                                                                      |                                                       |
| Q8TME9 | MA_2709 | Predicted protein                                                     |                                                                      |                                                       |
| Q8TMB1 | MA_2753 | Predicted protein                                                     |                                                                      |                                                       |
| Q8TMA9 | MA_2755 | Predicted protein                                                     |                                                                      |                                                       |
| Q8TM98 | MA_2768 | Predicted protein                                                     |                                                                      |                                                       |
| Q8TLS9 | MA_2949 | Predicted protein                                                     |                                                                      |                                                       |
| Q8TLS6 | MA_2952 | Hypothetical protein                                                  |                                                                      |                                                       |
| Q8TL56 | MA_3185 | MoaA/nifB/pqqE family protein, unknown function                       |                                                                      |                                                       |
| Q8TK83 | MA_3533 | Predicted protein                                                     |                                                                      |                                                       |
| Q8TLK1 | MA_3035 | PqqE, PQQ synthesis protein E                                         | This is not PqqE, it is AhbC (12,18-didecarboxysiroheme deacetylase) | Kuhner et al., 2014 (16);<br>Kuhner et al., 2016 (17) |
| Q8TKS9 | MA_3317 | AtsB, Arylsulfatase regulator                                         | Two genes annotated as AtsB in MA genome                             |                                                       |

|                                                                                             |         |                                                                                        |                                                    |                                               |
|---------------------------------------------------------------------------------------------|---------|----------------------------------------------------------------------------------------|----------------------------------------------------|-----------------------------------------------|
| Q8TKF9                                                                                      | MA_3448 | MoaA/nifB/pqqE family protein, unknown function                                        |                                                    |                                               |
| Q8TKC6                                                                                      | MA_3482 | MoaA/nifB/pqqE family protein, unknown function                                        |                                                    |                                               |
| Q8TKD3                                                                                      | MA_3475 | Predicted protein                                                                      |                                                    |                                               |
| Q8TJR7                                                                                      | MA_3711 | Hypothetical protein                                                                   |                                                    |                                               |
| Q8TJ11                                                                                      | MA_3979 | KAM, lysine 2,3-aminomutase                                                            |                                                    | Pflüger et al., 2003 (7)                      |
| Q8TIZ8                                                                                      | MA_3991 | Carboxymuconolactone decarboxylase                                                     | Likely not radical SAM                             |                                               |
| Q8TIJ8                                                                                      | MA_4151 | Metallo cofactor biosynthesis protein                                                  |                                                    |                                               |
| Q8TIH5                                                                                      | MA_4174 | FmdF, Formylmethanofuran dehydrogenase, subunit F                                      | Not radical SAM                                    |                                               |
| Q8TIF7                                                                                      | MA_4195 | NifB, nitrogen fixation protein                                                        |                                                    | Hu and Ribbe, 2016 (5); Kang et al., 2021 (6) |
| Q8TIF5                                                                                      | MA_4197 | QueE, 7-carboxy-7-deazaguanine synthase                                                |                                                    | McCarty et al., 2013 (2)                      |
| Q8TI77                                                                                      | MA_4279 | PqqE, PQQ synthesis protein E                                                          | Methanogens likely do not synthesize PQQ           |                                               |
| Q8TIB7                                                                                      | MA_4238 | Hypothetical protein                                                                   |                                                    |                                               |
| Q8THT9                                                                                      | MA_4422 | MoaA/nifB/pqqE family protein, unknown function                                        |                                                    |                                               |
| Q8THI2                                                                                      | MA_4534 | Hypothetical protein                                                                   |                                                    |                                               |
| Q8THG6                                                                                      | MA_4551 | MCR arginine C-methyltransferase (Mmp10)                                               |                                                    | Radle et al., 2019 (10)                       |
| Q8THA2                                                                                      | MA_4618 | UPF0313                                                                                |                                                    |                                               |
| <b>Known radical SAM enzymes in <i>M. acetivorans</i> with non-canonical cysteine motif</b> |         |                                                                                        |                                                    |                                               |
| Q8TSH0                                                                                      | MA_0826 | Elp3, tRNA uridine(34) 5-carboxymethylaminomethyl modification radical SAM/GNAT enzyme | CX <sub>4</sub> CX <sub>2</sub> C motif            | Selvadurai et al., 2014 (11)                  |
| Q8THK1                                                                                      | MA_4513 | RaSEA, archaeosine biosynthesis protein                                                | CX <sub>7</sub> CX <sub>2</sub> C motif            | Yokogawa et al, 2019 (12)                     |
| Q8TPW4                                                                                      | MA_1790 | ThiC1, Phosphomethylpyrimidine synthase 1                                              | C-terminal CX <sub>2</sub> CX <sub>3</sub> C motif |                                               |

## References:

1. Philmus B, Decamps L, Berteau O, Begley TP. 2015. Biosynthetic versatility and coordinated action of 5'-deoxyadenosyl radicals in deazaflavin biosynthesis. *J Am Chem Soc* 137:5406-13.
2. McCarty RM, Krebs C, Bandarian V. 2013. Spectroscopic, steady-state kinetic, and mechanistic characterization of the radical SAM enzyme QueE, which catalyzes a complex cyclization reaction in the biosynthesis of 7-deazapurines. *Biochemistry* 52:188-98.
3. Su X, Lin Z, Lin H. 2013. The biosynthesis and biological function of diphthamide. *Crit Rev Biochem Mol Biol* 48:515-21.
4. Arragain S, Handelman SK, Forouhar F, Wei FY, Tomizawa K, Hunt JF, Douki T, Fontecave M, Mulliez E, Atta M. 2010. Identification of eukaryotic and prokaryotic methylthiotransferase for biosynthesis of 2-methylthio-N<sup>6</sup>-threonylcarbamoyladenosine in tRNA. *J Biol Chem* 285:28425-33.
5. Hu Y, Ribbe MW. 2016. Maturation of nitrogenase cofactor-the role of a class E radical SAM methyltransferase NifB. *Curr Opin Chem Biol* 31:188-94.
6. Kang W, Rettberg LA, Stiebritz MT, Jasniewski AJ, Tanifuji K, Lee CC, Ribbe MW, Hu Y. 2021. X-Ray Crystallographic Analysis of NifB with a Full Complement of Clusters: Structural Insights into the Radical SAM-Dependent Carbide Insertion During Nitrogenase Cofactor Assembly. *Angew Chem Int Ed Engl* 60:2364-2370.
7. Pfluger K, Baumann S, Gottschalk G, Lin W, Santos H, Muller V. 2003. Lysine-2,3-aminomutase and beta-lysine acetyltransferase genes of methanogenic archaea are salt induced and are essential for the biosynthesis of N<sup>ε</sup>-acetyl-β-lysine and growth at high salinity. *Appl Environ Microbiol* 69:6047-55.
8. Gagsteiger J, Jahn S, Heidinger L, Gericke L, Andexer JN, Friedrich T, Loenarz C, Layer G. 2022. A Cobalamin-Dependent Radical SAM Enzyme Catalyzes the Unique Cα-Methylation of Glutamine in Methyl-Coenzyme M Reductase. *Angew Chem Int Ed Engl* doi:10.1002/anie.202204198.
9. Young AP, Bandarian V. 2015. Mechanistic Studies of the Radical S-Adenosyl-L-methionine Enzyme 4-Demethylwyosine Synthase Reveal the Site of Hydrogen Atom Abstraction. *Biochemistry* 54:3569-72.
10. Radle MI, Miller DV, Laremore TN, Booker SJ. 2019. Methanogenesis marker protein 10 (Mmp10) from *Methanosarcina acetivorans* is a radical S-adenosylmethionine methylase that unexpectedly requires cobalamin. *J Biol Chem* doi:10.1074/jbc.RA119.007609.
11. Selvadurai K, Wang P, Seimetz J, Huang RH. 2014. Archaeal Elp3 catalyzes tRNA wobble uridine modification at C5 via a radical mechanism. *Nat Chem Biol* 10:810-2.
12. Yokogawa T, Nomura Y, Yasuda A, Ogino H, Hiura K, Nakada S, Oka N, Ando K, Kawamura T, Hirata A, Hori H, Ohno S. 2019. Identification of a radical SAM enzyme involved in the synthesis of archaeosine. *Nat Chem Biol* 15:1148-1155.
13. McGlynn SE, Boyd ES, Shepard EM, Lange RK, Gerlach R, Broderick JB, Peters JW. 2010. Identification and characterization of a novel member of the radical AdoMet enzyme superfamily and implications for the biosynthesis of the Hmd hydrogenase active site cofactor. *J Bacteriol* 192:595-8.



14. Schick M, Xie X, Ataka K, Kahnt J, Linne U, Shima S. 2012. Biosynthesis of the iron-guanylylpyridinol cofactor of [Fe]-hydrogenase in methanogenic archaea as elucidated by stable-isotope labeling. *J Am Chem Soc* 134:3271-80.
15. Krzycki JA. 2013. The path of lysine to pyrrolysine. *Curr Opin Chem Biol* 17:619-25.
16. Kuhner M, Haufschildt K, Neumann A, Storbeck S, Streif J, Layer G. 2014. The alternative route to heme in the methanogenic archaeon *Methanosarcina barkeri*. *Archaea* 2014:327637.
17. Kuhner M, Schweyen P, Hoffmann M, Ramos JV, Reijerse EJ, Lubitz W, Broring M, Layer G. 2016. The auxiliary [4Fe-4S] cluster of the Radical SAM heme synthase from *Methanosarcina barkeri* is involved in electron transfer. *Chem Sci* 7:4633-4643.
